# Supplementary material
Source: publisher site journal article supplement (https://www.spandidos-publications.com/8440/downloadSupplementary)
Supplement: Supplementary file 1 [file downloadSupplementary]

## Sheet: Supplementary Table 3
Table SIII. List of programmed cell death-related genes
AATF
1ABL1
ACAA2
ACKR3
ACVR1
ACVR1B
ADORA1
AEN
AGT
AGTR2
AIFM1
AKT1
ANXA6
APAF1
APPL1
AR
ARHGEF2
ARL6IP5
ARMC10
ARRB2
ASAH2
ATF3
ATF4
ATM
ATP2A1
ATP2A3
ATP5IF1
AVP
BAD
BAG3
BAG5
BAG6
BAK1
BAX
BBC3
BCAP31
BCL10
BCL2
BCL2A1
BCL2L1
BCL2L10
BCL2L11
BCL2L12
BCL2L14
BCL2L2
BCL3
BCLAF1
BDKRB2
BDNF
BECN1
BID
BIK
BIRC6
BLOCIS2
BMF
BMP4
BMP5
BMPRIB
BNIP3
BNIP3L
BOK
BRCA1
BRCA2
BRSK2
BTK
CAAP1
CASP1
CASP10
CASP12
CASP2
CASP3
CASP4
CASP5
CASP8
CASP8AP2
CASP9
CAV1
CCAR2
CCK
CD14
CD24
CD27
CD28
CD38
CD3E
CD44
CD5
CD70
CD74
CDIP1
CDKNIA
CDKN2D
CEBPB
CFLAR
CHAC1
CHCHD10
CHEK2
CIB1
CIDEB
CLU
COA8
COL2A1
CRADD
CREB3
CREB3L1
CRH
CRIP1
CSF2
CSNK2A1
CSNK2A2
CTH
CTNNA1
CTSC
CTIN
CUL1
CUL2
CUL3
CUL4A
CUL5
CX3CL1
CX3CR1
CXCL12
CYLD
CYP1B1
DAB2IP
DAP
DAP3
DAPK1
DAPK2
DAPK3
DAPL1
DAXX
DBH
DCC
DDIAS
DDIT3
DDIT4
DDX3X
DDX47
DDX5
DEDD
DEDD2
DELE1
DEPTOR
DIABLO
DIDOI
DNAJA1
DNAJC10
DNMIL
DPF2
DYRK2
E2F1
E2F2
EDA2R
EIF2AK3
ELL3
ENO1
EP300
EPHA2
EPO
ERBB3
ERCC6
ERN1
ERN2
EROIA
ERP29
EYAI
EYA2
EYA3
EYA4
FADD
FAF1
FAIM
FAIM2
FAM162A
FAS
FASLG
FASTK
FBH1
FBXW7
FEMIB
FGA
FGB
FGF10
FGFR1
FGFR3
FGG
FHIT
FIGNL1
FIS1
FNIP2
FXN
FYN
FZD9
G0S2
GABARAP
GATA1
GATA4
GCLM
GDNF
GFRAL
GGCT
GHITM
GNA12
GNA13
GPER1
GPXI
GRINA
GSDME
GSK3A
GSK3B
GSKIP
GSTP1
GZMB
HDACI
HERPUIDI
HGF
HICI
HIFIA
HINTI
HIP1
HIPIR
HIPK1
HIPK2
HMGB2
HMOX1
HNRNPK
HRAS
HRK
HSPA1A
HSPAIB
HSPB1
HTRA2
HTT
HYAL2
HYOUI
ICAM1
IFI16
IF127
IFI27LI
IFI27L2
IFI6
IFNB1
IFNG
IGF1
IKBKE
IL12A
IL19
IL1A
1L1B
IL2
IL20RA
IL33
11A
IL6R
1L7
NCAI
ING2
ING5
INHBA
INHBB
INS
ITGA6
ITGAM
ITGAV
ITM2C
ITPRI
ITPRIP
IVNSIABP
JAK2
JMY
JUN
KDM1A
KITLG
KRT18
KRT8
LCK
LGALS12
LGALS3
LRRK2
LTBR
LY96
MADD
MAEL
MAGEA3
MAP2K5
MAP3K5
MAPK7
MAPK8
MAPK8IP1
MAPK8IP2
MAPK9
MARCHF7
MAZ
MCL1
MDN12
MELK
MFF
MIF
MIR132
MIR15A
MIR16-1
MIR17
MIR198
MIR21
MIR210
MIR221
MIR222
MIR26B
MIR27B
MIR449A
MKNK2
MLHI
MLLT11
MMP9
MNT
MOAP1
MPV17L
MSH2
MSH6
MSXI
MUCI
MULI
MYBBP1A
NACC2
NANOS3
NBN
NCKI
NCK2
NDUFA13
NDUFS3
NFATC4
NFE2L2
NGF
NGFR
NKX3-1
NLE1
NMES
NMT1
NOC2L
NOG
NOL3
NONO
NOS3
NOXI
NR4A2
NUPR1
OPAI
P2RX4
P2RX7
P4HB
PAK2
PAKS
PARK7
PARP1
PARP2
PAWR
PCGF2
PDCD10
PDCD5
PDCD6
PDIA3
PDK1
PDK2
PIDPK1
PDX1
PEA15
PELI3
PERP
PF4
PHIP
PHLDA3
PIAS4
PIDD1
PIHID1
PIK3R1
PINK1
PLAGL2
PLAUR
PLEKHF1
PLSCR3
PMAIP1
PML
POLB
POU4F1
POU4F2
PPARD
PPIA
PPIF
PPM1F
PPPICA
PPPIR13B
PPP1R15A
PPP2R1B
PPP3CC
PPP3R1
PRDX2
PRELID1
PRKCA
PRKCD
PRKDC
PRKN
PRKRA
PRODH
PSEN1
PSMD10
PSME3
PTEN
PTGIS
PTH
PTPMT1
PTPN1
PTPN2
PTPRC
PTTGIIP
PYCARD
QARS1
RACK1
RAF1
RB1
RBICCI
RBCK1
RELA
RET
RFFL
RHOT1
RHOT2
RIPKI
RIPK3
RNF183
RNF186
RNF34
RNF41
RPL11
RPL26
RPS27L
RPS3
RPS6KB1
RPS7
RRP8
RTKN2
RTL10
S100A8
S100A9
SCG2
SCN2A
SCRT2
SELENOK
SELENOS
SENP1
SEPTIN4
SERINC3
SERPINEI
SFN
SFPQ
SFRP1
SFRP2
SGMSI
SGPLI
SGPP1
SH3RFI
SHH
SHISAS
SIAHI
SIAH2
SIRT1
SIVA1
SKIL
SLC25AS
SLC35F6
SLC9A3R1
SMAD3
SNAII
SNA12
SNW1
SOD1
SOD2
SORT1
SP100
SRC
SRPX
SST
SSTR3
ST20
STK11
STK24
STK25
STK3
STK4
STRADB
STX4
STYXLI
SYVN1
TAF9
TAF9B
TCF7L2
TERT
TFDP1
TFDP2
TFPT
TGFB1
TGFB2
TGFBR1
THBS1
TICAM1
TICAM2
TIMM50
TIMP3
TLR3
TLR4
TM2D1
TMBIM1
TMBIM6
TMC8
TMEM102
TMEM109
TMEM117
TMEM14A
TMEM161A
TNF
TNFAIP3
TNFRSF10A
TNFRSF10B
TNFRSF10C
TNFRSF12A
TNFRSF1A
TNFRSFIB
TNFRSF25
TNFSF10
TNFSF12
TOPORS
TP53
TP53BP2
TP63
TP73
TPD52L1
TPT1
TRADD
TRAF1
TRAF2
TRAF7
TRAP1
TRIAP1
TRIB3
TRIM32
TRIM39
TXNDC12
TYROBP
UACA
UBB
UBE2K
UBE4B
UBQLNI
UMOD
UNC5B
URII
USP28
USP47
VDAC2
VNNI
WDR35
WNT4
WWOX
XBP1
YAP1
YBX3
YWHAB
YWHAE
YWHAG
YWHAH
YWHAQ
YWHAZ
ZC3HCl
ZDHHC3
ZMYND11
ZNF205
ZNF385A
ZNF385B
ZNF622
ZSWIM2
CASP6
CHMP2A
CHMP2B
CHMP3
CHMP4A
CHMP4B
CHMP4C
CHMP6
CHMP7
CYCS
ELANE
GPX4
GSDMB
GSDMC
GSDMD
HMGB1
IL18
ILIA
ILIB
IRF1
IRF2
NLRC4
NLRP1
NLRP2
NLRP3
NLRP6
NLRP7
NOD1
PLCG1
PJVK
PRKACA
SCAF11
TINAP
AIM2
GSDMA
IL6
NOD2
TIRAP
MMP1
MPO
CAMP
PAD14
EIPA
NCX1
MIA
IKBKB
NFKB1
CA9
CHUK
IKBKG
NFKBIA
PGAM5
KEAP1
NRF2
AIRE
FDX1
LIAS
LIPT1
DLD
DLAT
PDHA1
PDHB
MTF1
GLS
CDKN2A
GCSH
ATP7A
ATP7B
SLC31A1
AMPK
ATG5
ATG7
CDC42
CDH1
CYBB
MYH14
PI3KC3
RHOA
RNF146
ROCK
RUBCN
UVRAG
PARP
HSP70
PAAN
ARH3
ADPRHL2
OGG1
GLUD1
GLUD2
ALOX15
FTHI
PYG
CAPNI
GLNA
RIPK1
CAPN2
HSP90A
TNFSF6
INFRSF6
JNK
CAMK2
IL1B
STAT3
IRF9
XIAP
TRPM7
IFNAR1
IFNAR2
IFNGR1
IFNGR2
TIRP
IFNA
IFNB
TRIF
VDACI
SLC25A4S
PPID
MLKL
TRAF5
JAK1
JAK3
TYK2
STAT1
STAT2
STAT4
STAT5A
STAT5B
STAT6
H2A
RNF31
VPS24
VPS4
CHMP1
CHMP5
SMPD1
ZBP1
FTL
SQSTM1
VDAC3
BIRC2
BIRC3
EIF2AK2
PLA2G4
SPATA2
SHARPIN
NOX2
USP21
ABCC1
ACACA
ACO1
ACSF2
ACSL1
ACSL3
ACSL4
ACSL5
ACSL6
AIFM2
AKRIC1
AKRIC2
AKR1C3
ALOX12
ALOX5
ATP5MC3
BACH1
CARS
CBS
CISD1
CP
CRYAB
CS
DPP4
EMC2
FADS2
FANCD2
FDFT1
FTH1
FTMT
G6PD
GCLC
GLS2
GOT1
GSS
HMGCR
HSBP1
IREB2
LPCAT3
MAPILC3A
MAPILC3B
MAP1LC3C
MTIG
NCOA4
NFS1
NOX1
NQO1
OTUB1
PCBP1
PCBP2
PEBP1
PGD
PHKG2
PRNP
PROM2
PTGS2
RPL8
SAT1
SAT2
SLC11A2
SLC1A5
SLC39A14
SLC39A8
SLC3A2
SLC40A1
SLC7A11
SQLE
STEAP3
TF
TFRC
ZEB1
ABCA2
ABCB9
ACP2
ACP5
ADGRE2
AGA
AP1B1
APIG1
APIM1
AP1M2
APISI
APIS2
APIS3
AP3B1
AP3B2
AP3D1
AP3M1
AP3M2
AP3S1
AP3S2
AP4B1
AP4E1
AP4M1
AP4S1
ARF1
ARL8B
ARSA
ARSB
ARSG
ASAH1
ATP10B
ATP13A2
ATP6AP1
ATP6V0A1
ATP6V0A2
ATP6V0A4
ATP6V0B
ATP6V0C
ATP6V0D1
ATP6V0D2
ATP6V1H
BLK
BLOCISI
BORCS5
BORCS6
C12orf4
CBL
CD164
CD300A
CD63
CD68
CD84
CHGA
CLN3
CLN5
CLNK
CLTA
CLTB
CLTC
CLTCL1
CPLX2
CTNS
CTSA
CTSB
CTSD
CTSE
CTSF
CTSG
CTSH
CTSK
CTSL
CTSO
CTSS
CTSV
CTSW
CTSZ
DEF8
DNASE2
DNASE2B
ENTPD4
FAM98A
FER
FES
FGR
FLCN
FOXF1
FUCA1
GAA
GAB2
GALC
GALNS
GATA2
GBA
GCC2
GGA1
GGA2
GGA3
GLA
GLB1
GM2A
GNPTAB
GNPTG
GNS
GUSB
HDAC6
HEXA
HEXB
HGS
HGSNAT
HPS6
HSPA8
HYAL1
IDS
IDUA
IGF2R
IL13
IL13RA2
IL4
IL4R
KIFIB
KIT
KXD1
LAMP1
LAMP2
LAMP3
LAMTORI
LAPTM4A
LAPTM4B
LAPTM5
LAT
LAT2
LGALS9
LGMN
LIPA
LYN
M6PR
MAN2B1
MANBA
MAP6
MCOLN1
MFSD8
MILR1
MRGPRX2
MT3
MYH9
NAGA
NAGLU
NAGPA
NAPSA
NDEL1
NEDD4
NEU1
NPC1
NPC2
NR4A3
PDPK1
PIK3C3
PIK3CD
PIK3CG
PIP4K2A
PIP4K2B
PIP4P1
PLA2G15
PLA2G3
PLEKHM1
PLEKHM2
PPT1
PPT2
PSAP
PSAPL1
PTGDR
PTGDS
RAB34
RAB3A
RAB7A
RAC2
RUBCNL
S100A13
SCARB2
SGSH
SLC11AI
SLC17A5
SNAP23
SNAPIN
SNX16
SNX4
SORL1
SPAG9
SPHK2
SQSTMI
STXBP1
STXBP2
SUMF1
SYK
SYTLA
TCIRG1
TFEB
TMEM106B
TPP1
UNC13D
VAMP7
VAMP8
VPS33A
VPS33B
VPS4A
WASH3P
ZFYVE16
ABL1
ABL2
ACER2
ADRA1A
ADRB2
AMBRA1
ATF6
ATG101
ATG13
ATG14
ATG2A
ATG2B
ATP6V0E1
ATP6V0E2
ATP6V1A
ATP6V1B1
ATP6V1B2
ATP6V1C1
ATP6V1C2
ATP6VID
ATP6V1E1
ATP6V1E2
ATP6V1G1
ATP6V1G2
ATP6VIH
AUP1
C9orf72
CALCOCO2
CAMKK2
CAPN1
CAPNS1
CDC37
CDK5
CDK5R1
CISD2
CLEC16A
CPTP
CTTN
DCN
DDRGKI
DEPDC5
DEPP1
DHRSX
DRAM1
DRAM2
BEF1A1
EEF1A2
EIF2AK4
EIF4G1
EIF4G2
ELAPOR1
EPM2A
ERCC4
EXOC1
EXOC4
EXOC7
EXOC8
FBXL2
FBXO7
FEZ1
FEZ2
FOXK1
FOXK2
FOXO1
FOXO3
FYCO1
FZD5
GAPDH
GFAP
GNAB
GOLGA2
GPR137
GPR137B
GPSM1
HAX1
HERC1
HSP90AA1
HSPB8
HTR2B
HUWE1
IF116
1L10
IL10RA
IRGM
TPR1
KAT5
KAT8
KDM4A
KDR
KIF25
KLHL22
KLHL3
LACRT
LAMTOR1
LAMTOR2
LAMTOR3
LAMTOR4
LAMTOR5
LARP1
LEP
LEPR
LGALS8
LRSAM1
LZTS1
MAP1LC3A
MAP1LC3B
MAP3K7
MAPK15
MAPK3
MAPT
MEFV
MET
MFN2
MID2
MIR199A1
MIRLET7B
MLST8
MTCL1
MTDH
MTM1
MTMR3
MTMR4
MTMR8
MTMR9
MTOR
NPRL2
NRBP2
OPTN
ORMD13
OSBPL7
PAFAH1B2
PHB2
PHF23
PIK3C2A
PIK3CA
PIK3CB
PIK3R2
PIM2
PIP4K2C
PLK2
PLK3
POLDIP2
PRKAA1
PRKAA2
PRKAB1
PRKAB2
PRKAG1
PRKAG2
PRKAG3
PRKDI
PTPN22
QSOX1
RAB39B
RAB3GAP1
RAB3GAP2
RAB8A
RALB
RASIP1
RB1CC1
RETREGI
RETREG3
RHEB
RIPK2
RMC1
RNF152
RNF5
ROCK1
RPTOR
RRAGA
RRAGB
RRAGC
RRAGD
RUFY4
SCFD1
SCOC
SEC22B
SESNI
SESN2
SESN3
SH3BP4
SH3GLB1
SIRT2
SLC38A9
SMCR8
SMG1
SNCA
SNRNP70
SNX32
SNX5
SNX6
SOGAI
SOGA3
SPTLCI
SPTLC2
SREBF1
SREBF2
STBD1
STING1
STUB1
SUPT5H
SVIP
SYNPO2
TAB2
TAB3
TBC1D14
TBC1D25
TBK1
TEX264
TICAMI
TIGAR
TLK2
TMEM150A
TMEM15013
TMEM150C
TMEM39A
TMEM39B
TMEM59
TOMM7
TP53INP1
TP53INP2
TPCN1
TPCN2
TREM2
TR1B3
TRIM13
TRIM14
TRIM21
TRIM22
TRIM27
TRIM34
TRIM38
TRIM5
TRIM6
TRIM65
TRIM68
TRIM8
TRIMLI
TRIML2
TSC1
TSC2
TSPO
UBAS
UBQLN2
UBQLN4
UCHLI
UFCI
UFLI
UFMI
ULKI
USP10
USP13
USP30
USP33
USP36
VDAC1
VPS13C
VPS13D
VPS26A
VPS26B
VPS35
WAC
WASHC1
WDFY3
WDR24
WDR41
WDR6
WDR81
WIPI2
ZC3H12A
ZKSCAN3
ZMPSTE24
